# Supplementary material for: Incidence and Time Trends of Type 2 Diabetes Mellitus among Adults in Zhejiang Province, China, 2007-2017
Source: Hindawi journal article supplement (doi:10.1155/2020/2597953), 2020-01-20
Supplement: f1 [file 2597953.f1.pdf]

Supplementary Table 1. Average annual percentage change of type 2 diabetes incidence by demographic factors

| Characteristic | Average annual percentage change (%) | 95% CIs   |           |
|----------------|--------------------------------------|-----------|-----------|
|                |                                      | Lower (%) | Upper (%) |
| Males          |                                      |           |           |
| 20-29 years    | 12.07                                | 11.12     | 13.02     |
| 30-39 years    | 8.95                                 | 8.53      | 9.37      |
| 40-49 years    | 4.31                                 | 4.08      | 4.54      |
| 50-59 years    | 3.71                                 | 3.52      | 3.91      |
| 60-69 years    | 2.48                                 | 2.28      | 2.68      |
| 70-79 years    | 0.61                                 | 0.37      | 0.86      |
| ≥ 80 years     | -1.41                                | -1.78     | -1.03     |
| ≥ 20 years     | 5.19                                 | 5.09      | 5.30      |
| Females        |                                      |           |           |
| 20-29 years    | 13.88                                | 12.80     | 14.96     |
| 30-39 years    | 8.44                                 | 7.89      | 8.99      |
| 40-49 years    | 0.76                                 | 0.49      | 1.04      |
| 50-59 years    | -0.33                                | -0.51     | -0.14     |
| 60-69 years    | -0.28                                | -0.47     | -0.10     |
| 70-79 years    | -0.24                                | -0.46     | -0.01     |
| ≥ 80 years     | 0.76                                 | 0.39      | 1.12      |
| ≥ 20 years     | 2.79                                 | 2.69      | 2.89      |
| Residence area |                                      |           |           |
| Urban          | 1.17                                 | 1.06      | 1.28      |
| Rural          | 5.74                                 | 5.64      | 5.83      |
| Overall        |                                      |           |           |
| 20-29 years    | 12.89                                | 12.18     | 13.60     |
| 30-39 years    | 8.72                                 | 8.39      | 9.06      |
| 40-49 years    | 2.84                                 | 2.66      | 3.02      |
| 50-59 years    | 1.73                                 | 1.59      | 1.86      |
| 60-69 years    | 1.04                                 | 0.90      | 1.18      |
| 70-79 years    | 0.14                                 | -0.02     | 0.31      |
| ≥ 80 years     | -0.22                                | -0.48     | 0.04      |
| ≥ 20 years     | 4.01                                 | 3.94      | 4.08      |

Multivariable Poisson regression models with the calendar year as a continuous variable and adjusting for the other covariates.

CI: confidence interval
